1  
2  
3  
4  
5  
6  
7  
8  
9  
10  
11  
12  
13  
14  
15  
16  
17  
18  
19  
20  
21  
22  
23

**Signaling the agency of an erroneous outcome via synchronization of spikes in the cerebellum**

Jay S. Pi, Ehsan Sedaghat-Nejad, Mohammad Amin Fakharian,  
Paul Hage, and Reza Shadmehr

Laboratory for Computational Motor Control, Dept. of Biomedical Engineering  
Johns Hopkins School of Medicine, Baltimore, Maryland USA

**Correspondence:** Reza Shadmehr or Jay S. Pi, Johns Hopkins School of Medicine, 410 Traylor Building,  
720 Rutland Ave., Baltimore, MD 21205.  
Email: shadmehr@jhu.edu or jay.s.314159@gmail.com

**Acknowledgements:** The work was supported by grants from the National Science Foundation (CNS-  
1714623), the NIH (R01-EB028156, R01-NS078311), and the Office of Naval Research (N00014-15-1-  
2312).

**Author contributions:** J.S.P., E.S.H, P.H., and R.S. conceived and performed experiments. J.S.P., E.S.N.,  
M.A.F., and R.S. analyzed data, J.S.P. made figures and performed statistical analysis. R.S. wrote the  
manuscript.

**Competing interests:** None.

## 24 **Abstract**

25 Claiming agency is a prerequisite for taking responsibility: the brain must differentiate between the  
26 sensory events that are the erroneous consequences of our actions, and thus may be remedied if we  
27 change our behavior, and the many other events in our environment that consume our attention, but  
28 for which we have no means of influence. In the cerebellum, the firing rates of complex spikes of  
29 Purkinje cells signal that a sensory or a motor event has taken place, but do not specify if that event was  
30 the consequence of the animal's action. Instead, to claim agency of a sensory outcome, the complex  
31 spikes synchronize within the population of Purkinje cells that guided that action. As a result, in the  
32 cerebellum the erroneous sensory consequences of movements are identified not via modulation of  
33 complex spike firing rates, but via synchronization of spikes.

34

## 35 **Introduction**

36 We attend to numerous sensory events around us, recognizing that only a fraction are the consequences  
37 of our own actions. Identifying which sensory events are our responsibility, and which are beyond our  
38 means of influence, is a first step in generating a learning signal that can improve our behavior. How  
39 does the brain differentiate between the sensory events for which we have agency, and thus can change  
40 by altering our behavior, and those that we attend to, but for which we have no means of influence?

41 The cerebellum provides an important substrate to investigate this question because motor  
42 learning implicitly requires a sense of agency: we must believe that a sensory event was the  
43 consequence of our movement before we invest the resources that promote learning from the sensory  
44 prediction errors. Indeed, theories of cerebellar function suggest that we learn how to move because  
45 the inferior olive provides a teaching signal to the Purkinje cells (P-cells) of the cerebellum (1, 2),  
46 controlling the rates of complex spikes (CS) to indicate that the sensory consequences of a movement  
47 were in error (3–5). However, these rate changes are not specific to erroneous movements (6). Rather,  
48 the CS rates change in response to a variety of sensory events (7–12), and before a variety of  
49 movements (13–17).

50 For example, CS rates are modulated by the touch of a limb (18), an air puff to the face (9, 10,  
51 19), or sudden presentation of a visual stimulus (8, 20), signaling that a salient sensory event has  
52 occurred (9, 12), particularly one that is rewarding (11). Moreover, CS rates are modulated before the  
53 onset of motor events such as walking (15), licking (13), reaching (14, 16, 17), and moving the wrist (21).  
54 Indeed, production of CSs, either through the action of the drug harmaline (22), or the stimulation of  
55 climbing fibers (23), generates movements. This rich diversity of events that modulate CS rates raises a  
56 critical problem for theories that view the cerebellum as a learning machine (24, 25): how does the  
57 cerebellum distinguish the erroneous consequences of a movement in a signal that generously responds  
58 to both sensory and motor events?

59 During simultaneous recordings from many P-cells in a non-human primate (marmosets), we  
60 observed that the erroneous sensory consequences of saccades were sent to the cerebellum not via  
61 modulation of CS firing rates, but via synchronization of CS timing in the population of P-cells that was  
62 responsible for guiding that saccade. Before a movement began, both the sensory event that instructed  
63 the movement, and the movement itself, were accompanied with CS rate modulation. However, if the  
64 movement resulted in an erroneous outcome, then that sensory event caused the olive to re-engage the  
65 P-cells, again producing CS rate modulation, but now synchronously.

66

## 67 **Results**

68 Inspired by the behavioral work of Wallman and Fuchs (26) and Tseng et al. (27), we designed a 2x2 task  
69 in which a visual event was sometimes but not always followed by a movement, and a movement that  
70 was sometimes but not always preceded by a visual event (Fig. 1C). Some of the visual events were  
71 unpredictable, producing sensory prediction errors (SPEs), while others were predictable. Critically, only  
72 one of the SPEs signaled the erroneous outcome of a movement.

73 Marmosets fixated at a center location and were presented with a primary target at a random  
74 direction (Fig. 1A). As the primary saccade commenced, we moved the target to a secondary location,  
75 also at a random direction (Fig. 1B). To assign a value to this erroneous outcome, in 51% of the sessions  
76 reward required both the primary and the corrective saccades, whereas in the remaining sessions  
77 reward required only the primary saccade. If reward did not require the corrective saccade, the  
78 secondary target was presented only briefly and returned to the primary location (~120 ms, adjusted  
79 during the recording session). Following 200 ms fixation of the final target, the center target was  
80 presented, and the subject made a back-to-center saccade. Thus, the primary target was an  
81 unpredictable sensory event that instructed a movement. The center target also instructed a  
82 movement, but was predictable. The secondary target was unpredictable, but only sometimes  
83 instructed a movement. However, the secondary target was the sole event that indicated the erroneous  
84 consequences of a movement.

85 We used MRI and CT guided targeting procedures (28) to place tetrodes, heptodes, and silicon  
86 probes in lobules VI and VII of the vermis and recorded from n=268 saccade modulated P-cells. In every  
87 case, the neuron was identified as a P-cell because of the presence of CSs. For each type of visual event  
88 (primary, secondary, and center target), we estimated the direction that produced the largest increase  
89 in CS firing rates and labeled it as CS-on (Fig. S1A). The CS-on direction remained consistent across the  
90 various visual events (Fig. S1C). Thus, we combined the CS response for all visual events and defined the  
91 CS-on direction of each P-cell. The CS-on direction varied approximately with the cell's location in the  
92 vermis (Fig. S1B) (8, 29).

93 Presentation of the primary target in direction CS-on produced a sharp increase in CS rates at  
94  $65.9 \pm 0.28$  ms, and then a broad increase at 130 ms (Fig. 1D). In contrast, when the primary target was in  
95 direction CS+180, the CS rates were suppressed below baseline at around  $87.1 \pm 3.3$  ms latency. This  
96 direction-dependent response was also present when the data were aligned to saccade onset. When the  
97 saccade was delayed because of a long reaction time, the CS rate modulation remained, but became  
98 weaker in response to the visual stimulus, and before the saccade (Fig. S2A). Occasionally, the primary  
99 target was presented but the subject made a saccade in a different direction (Fig. S2B). In this case, the  
100 olive continued to respond to the visual event at 70 ms latency (Fig. S2B), but the later response at 130  
101 ms vanished. However, before task irrelevant saccades (Fig. 1D) the CS rate modulation was  
102 considerably weaker (50ms period before saccade onset, Wilcoxon signed rank,  $z=6.15$ ,  $p < 10^{-6}$ ). Thus,  
103 the CS rates were modulated both in response to the visual events, and by the movements that followed  
104 those visual events.

105 Both the primary and the secondary targets were unpredictable. However, only the secondary  
106 target indicated the erroneous consequences of a movement, i.e., an event that induces motor learning  
107 (5). We considered all trials (in all sessions) in which the subject made a corrective saccade and found  
108 that paradoxically, the CS-on rates were actually weaker following the secondary target as compared to

109 the primary target (25-75ms post target onset, Wilcoxon signed rank,  $z=5.79$ ,  $p<10^{-6}$ ). Unlike the primary  
110 and secondary targets, both the onset and the position of the center target were predictable. As a  
111 result, the reaction times were shorter for the center saccades (median of 159 vs. 170 ms, Wilcoxon  
112 rank sum,  $z=50.26$ ,  $p<10^{-8}$ ). Yet, the CS response to the center target was similar to the primary target  
113 (Fig. 1D). Thus, the CS rates were modulated following both predictable and unpredictable visual events.  
114 Notably, the CS rates could not identify the visual event that indicated the erroneous consequences of a  
115 movement.

116 Our data included  $n=99$  pairs of simultaneously isolated P-cells in which we computed the  
117 probability of synchronously timed CSs, corrected for chance (29). Because the CS rates were extremely  
118 low (Fig. S1A), we collapsed the trials across directions and found that at baseline, CS synchrony was  
119 roughly two times greater than chance (30). However, unlike the firing rates, the probability of  
120 synchrony did not change in response to the primary or center targets, nor did it change before the  
121 onset of the primary or center saccades (Fig. 1E). Remarkably, CS synchrony increased following the  
122 secondary target: it reached a peak at around 80 ms after the secondary target (50-100ms after visual  
123 event, secondary vs. primary target, Wilcoxon signed rank,  $z=4.27$ ,  $p=0.00038$ ), and 40 ms before the  
124 onset of the corrective saccade (25-75ms before onset, Wilcoxon signed rank,  $z=2.95$ ,  $p=0.017$ ). Thus,  
125 whereas CS rates were strongly modulated following the onset of the primary and center targets, and  
126 before the onset of the primary and center saccades, none of these sensory or motor events affected CS  
127 synchrony. Instead, CS synchrony increased only following the sensory event that signaled the  
128 erroneous consequences of a movement.

129 We were concerned that CS synchronization may be unrelated to the secondary target, and  
130 merely an event associated with the conclusion of a saccade. To check for this, we aligned the data to  
131 the termination of the various saccades and found that synchronization increased only after the primary  
132 saccade, i.e., when the erroneous sensory event was experienced, but not after other saccades (Fig. S3).  
133 In addition, because the secondary saccades were smaller in amplitude than other saccades,  
134 synchronization may have been an artifact of this difference. Thus, we selected a subset of the center  
135 saccades that had similar amplitudes as the corrective saccades and found that CS synchronization  
136 remained greater for the corrective saccades (Fig. S4, 100ms period following visual onset, Wilcoxon  
137 signed rank,  $z=5.72$ ,  $p=2\times 10^{-6}$ ).

138 We next devalued the erroneous sensory consequences of the movement: in some sessions the  
139 secondary target was presented briefly ( $119\pm 59$  ms, mean $\pm$ SD) and reward acquisition no longer  
140 required making a corrective saccade. As a result, in only  $35\pm 15\%$  of trials the subjects made the  
141 correction, while in the remaining trials they ignored the secondary target. This devaluation of the  
142 sensory event altered the CS rates: when the secondary target was in direction CS-on, even in trials in  
143 which the corrective saccade was made the CS rates no longer exhibited the sharp increase at 70 ms  
144 (Figs. 2A & 2C, comparison of sessions in which the corrective saccade was required to optional, 100 ms  
145 following target onset, Wilcoxon rank sum,  $z=3.08$ ,  $p=0.0047$ ). Indeed, the rates exhibited a brief  
146 suppression in trials in which the subjects chose to ignore the secondary target (Fig. 2A, first row). Thus,  
147 devaluing the secondary target suppressed the CS rates (11, 16, 31), and the rates were further  
148 suppressed if the decision was to withhold the corrective saccade. While this devaluation of the sensory  
149 event led to reduced CS rates, if the subject chose to respond to it, then the CSs synchronized in  
150 response to the target (Fig. 2B, 50-100 ms period, comparison with primary target, Wilcoxon signed

151 rank,  $z=5.01$ ,  $p=0.000026$ ), and before the onset of the corrective saccade (25-100 ms period,  
152 comparison with primary saccade, Wilcoxon signed rank,  $z=3.89$ ,  $p=0.00256$ ). Remarkably, even if the  
153 subject chose to ignore the secondary target, the CSs were still more synchronized than in response to  
154 the primary target (50-100 ms period, Wilcoxon signed rank test,  $z=4.82$ ,  $p=1.2 \times 10^{-5}$ ).

155 But how might CSs synchronize in response to only the secondary target? In our experiment, the  
156 secondary target was a visual event that followed a saccade, whereas all the other visual events took  
157 place during fixation. The origin of CS synchrony is the gap junctions of the inferior olive (32), which are  
158 more synchronized during movements vs. rest (33). Thus, the production of a movement may alter the  
159 state of the olive, making it more prone to synchronization. One way that this can occur is that the  
160 simple spikes (SS) that are produced during a movement (29) may influence not only the ongoing  
161 saccade via the fastigial nucleus neurons that project to the brainstem burst generators (34), but also  
162 change the state of the inferior olive through nucleo-olive projections (35, 36). To check for this, we  
163 asked whether the SS activity of the P-cells had any influence on the subsequent probability of CS  
164 synchrony.

165 The primary and center targets were presented when the subject was fixating. During fixation,  
166 the SS rates were suppressed below baseline, even when no CSs were present (Fig. 3A). The  
167 presentation of a visual target strongly modulated the CS rates (Fig. 1D) but had no effects on the SS  
168 rates (Fig. 3C). Instead, at around 80 ms following the visual stimulus the SS rates returned to baseline,  
169 presumably reflecting the end of the fixation period and the prelude to a saccade. In contrast to the  
170 apparent lack of an SS response to the visual events, the SS rates were strongly modulated by  
171 movements. Before saccade onset, the rates rose above baseline and produced a burst (Fig. 3C). In  
172 direction CS+180, the burst was followed by a brief pause that was timed with deceleration onset. Thus,  
173 in contrast to the CS rates that were modulated by both visual and motor events, the SS rates were  
174 modulated by movements but not visual events.

175 At baseline, the SS synchronization index was between 1.25 and 1.50 (Fig. 3D), demonstrating  
176 that SS timing in neighboring P-cells was 25-50% more synchronized than would be expected by chance.  
177 SS synchronization did not change following the onset of the primary target (Fig. 3C). Rather, SS  
178 synchronization increased during movements, particularly at deceleration onset in direction CS+180  
179 (29). Despite the fact that P-cells are inhibitory neurons, a synchronous SS in a population of P-cells can  
180 entrain the nucleus neurons, making them fire (37), re-setting the phase of the membrane oscillations in  
181 the inferior olive cells that produce the CSs (38). Thus, we asked whether the synchronous CS response  
182 to the secondary target was influenced by the probability of SS synchrony in the preceding primary  
183 saccade.

184 We divided the primary saccades based on whether they exhibited a synchronous SS event in  
185 the 100 ms period before saccade end and found that if the primary saccade included a synchronous SS  
186 event, then the CS response to the secondary target was more synchronous (Fig. 4A, left subplot, 200ms  
187 period from visual onset, Wilcoxon signed rank  $z=5.32$   $p=1 \times 10^{-6}$ ). However, because SS synchrony varied  
188 with the direction of the primary saccade, this result may have been simply an effect of saccade  
189 direction. Thus, we focused on the primary saccades that were in direction CS+180, the direction that  
190 exhibited the greatest probability of SS synchrony, and again divided the primary saccades based on the  
191 presence or absence of a synchronous SS event. Remarkably, primary saccades that had included a  
192 synchronous SS event were followed by a multi-peaked, synchronous CS response to the secondary

193 target (Fig. 4A, right subplot, 200ms period from visual onset, Wilcoxon signed rank  $z=2.93$   $p=0.027$ ).  
194 Moreover, these primary saccades also exhibited a sharp peak in CS synchrony near saccade end (arrow,  
195 Fig. 4A), at around the time that SS synchrony tends to be greatest. As a result, the CSs exhibited greater  
196 synchrony in response to the erroneous sensory consequences of the primary saccade when the primary  
197 saccade itself included a synchronous SS event.

198

## 199 **Discussion**

200 The input from the inferior olive to the cerebellum conveys information that guides learning (39, 40),  
201 but this same input also provides information about diverse sensory and motor events that are not  
202 errors (7, 10, 12). In our task, we observed that the olivary input to P-cells was modulated following the  
203 onset of visual targets, and before the onset of saccades towards those targets (20, 41). Notably, the CS  
204 firing rates were modulated regardless of whether the visual event indicated a movement error or not.  
205 These rate modulations were quite sensitive to the reward value of the stimulus: CS firing rates were  
206 suppressed when the stimulus was devalued, particularly if the animal withheld a movement toward it.  
207 Yet, the CS rates could not distinguish the erroneous consequences of a movement from other events.

208 To signal that the visual event was the erroneous consequences of a movement, the CSs became  
209 synchronized. The probability of CS synchrony was greater if the visual event followed a movement that  
210 itself had a synchronous SS event. Given that the P-cells exhibited SS modulation only during  
211 movements, and not in response to the visual events (Fig. 3C), the results suggest that the input that the  
212 inferior olive receives during the primary saccade from the cerebellum sets the stage so that if that  
213 movement is followed by a visual event, then the olivary cells will respond synchronously (Fig. 4B). As a  
214 result, agency is established via a sequence of events: SS synchrony during a movement, followed by CS  
215 synchrony in response to the sensory feedback that the olive receives after that movement. In this way,  
216 CS synchrony appears to dissociate erroneous sensory consequences from other sensorimotor events.

217

### 218 *Why does the olive respond synchronously to the erroneous consequences of the movement?*

219 The origin of CS synchrony is the gap junctions of the inferior olive (32), which are more synchronized  
220 during movements (vs. rest), and become even more synchronized if a perturbation disrupts the  
221 movement (33). In our experiment, all visual events took place during fixation, except for the secondary  
222 target, which followed a saccade. During fixation the SS rates were suppressed below baseline, and the  
223 SS synchrony was at baseline. In contrast, during saccades the SS rates were not only modulated, they  
224 were also more synchronized, especially when the saccade was in direction CS+180. SS synchrony tends  
225 to entrain nucleus neurons (37), making them fire. It is possible that the SS synchronization that occurs  
226 during a saccade not only steers the ongoing movement via the output from the fastigial nucleus to the  
227 saccade burst generators (34), but also alters the state of the inferior olive through nucleo-olive  
228 projections (35), resetting the phase of their subthreshold membrane potentials (38, 42).

229 When the primary saccade ends and the secondary target is presented, that sensory event again  
230 engages the neurons in the superior colliculus, which in turn transmit their information to the inferior  
231 olive, producing modulation of the CS rates. However, the SS synchrony in the primary saccade, if  
232 indeed is transmitted to the olive, may make the olivary neurons respond more synchronously to the  
233 secondary target. Consistent with this view, we found that if the primary saccade included a



234 synchronous SS event, then in the same P-cells, the CS response to the secondary target tended to be  
235 more synchronous.

236

### 237 *A role for the cerebellum during holding still*

238 We found that the SS rates were suppressed below baseline during task-relevant fixations, but not when  
239 fixations were spontaneous and task-irrelevant. This suggests that the oculomotor regions of the vermis  
240 play an active role both during control of saccades, and during control of fixation (43). Our observations  
241 shed light on a recently reported clinical symptom termed “fixation nystagmus” in which patients exhibit  
242 nystagmus while fixating a visual target, but not during other periods of fixation (44). Indeed, a major  
243 symptom of cerebellar damage is loss of muscle tone, which is manifested during the active process of  
244 holding still (45). Our results predict that in arm regions of the cerebellum, the P-cell SS rates may also  
245 be suppressed when the subject is actively holding the arm still (e.g., against gravity).

246

### 247 *A role for the cerebellum during movements*

248 It has been noted that the SS rates correlate with kinematic variables like position and/or velocity (46–  
249 49), but because such signals often correlate with the motor commands, it is not clear whether the P-  
250 cell output is a prediction of the sensory consequences, or the motor commands needed to generate a  
251 desired sensory consequence (50). Previously we reported that the SS rates exhibited a burst before  
252 saccade onset, but then fell below baseline and synchronized around the onset of deceleration (29). The  
253 magnitude of the burst grew with saccade velocity, but the timing of the pause remained locked to  
254 deceleration onset, especially when the saccade was in direction CS+180. The CS-on direction of a P-cell  
255 tends to be aligned with the direction of action of its downstream nucleus neuron (5, 51, 52), which  
256 implies that during a saccade in direction CS+180, the increased synchrony combines with disinhibition  
257 to entrain the nucleus neurons (37, 53), producing downstream forces that are aligned with direction  
258 CS-on of the parent P-cells. As a result, the burst-pause SS rate modulation and synchronization will  
259 produce forces that oppose the direction of movement, bringing the saccade to a stop. This implies that  
260 the function of the SSs, at least in this part of the cerebellum, is not to predict sensory consequences,  
261 but to produce force.

262 Indeed, our results here appear consistent with this idea because we found that while the CS  
263 rates were principally modulated by visual events irrespective of whether those events were followed by  
264 movements or not. In contrast, the same visual events were undetectable in the SS rates. Rather, the SS  
265 rates were modulated only during movements.

266 From a computational perspective, the implication is that the P-cells may not be computing a  
267 forward model because their output is not predicting sensory consequences. Rather, the computations  
268 are more akin to a disturbance compensator, i.e., a system that learns how to alter the ongoing motor  
269 commands from a teacher (inferior olive) that provides error information in sensory coordinates (54).

270

### 271 *Complex spikes and learning*

272 We speculate that CS synchronization, coupled with rate modulation, may be the prerequisite for  
273 learning in the cerebellum. Here, we were unable to test for this because our paradigm required random  
274 primary saccades, followed by random errors, which together made it impossible to quantify the

275 behavioral consequences of CS synchronization on learning. However, when CSs are more synchronized,  
276 they tend to have more spikelets in their waveforms (55), which in turn enhances learning (56–59).

277 The CSs in this region of the cerebellum arise partly from inputs that the inferior olive receives  
278 from the superior colliculus (60, 61). The collicular neurons respond following the onset of visual events,  
279 and before the onset of saccades, and indeed the P-cells show CS rate modulation in response to both  
280 events. However, the P-cells exhibit SS synchrony only during saccades, particularly those in direction  
281 CS+180. As a result, it seems likely that a movement alters the sensitivity of the olivary neurons to the  
282 sensory event that might follow it, making it to not only produce CSs in response to the secondary  
283 target, but to do so synchronously.



## 284 **Methods**

285 Data were collected from two marmosets (*Callithrix Jacchus*, male and female, 350-370 g, subjects M  
286 and R, 6 years old). The marmosets were born and raised in a colony that Prof. Xiaoqin Wang has  
287 maintained at the Johns Hopkins School of Medicine since 1996. The procedures on the marmosets  
288 were approved by the Johns Hopkins University Animal Care and Use Committee in compliance with the  
289 guidelines of the United States National Institutes of Health.

### 290 *Data acquisition*

291 Following recovery from head-post implantation surgery, the animals were trained to make saccades to  
292 visual targets and rewarded with a mixture of applesauce and lab diet (28). Visual targets were  
293 presented on an LCD screen (Curved MSI 32" 144 Hz - model AG32CQ) while binocular eye movements  
294 were tracked using an EyeLink-1000 eye tracking system (SR Research, USA). Timing of target  
295 presentations on the video screen was measured using a photo diode.

296 We performed MRI and CT imaging on each animal and used the imaging data to design an alignment  
297 system that defined trajectories from the burr hole to various locations in the cerebellar vermis (28),  
298 including points in lobule VI and VII. We used a piezoelectric, high precision microdrive (0.5 micron  
299 resolution) with an integrated absolute encoder (M3-LA-3.4-15 Linear smart stage, New Scale  
300 Technologies) to advance the electrode.

301 We recorded from the cerebellum using quartz insulated 4 fiber (tetrode) or 7 fiber (heptode) metal  
302 core (platinum/tungsten 95/05) electrodes (Thomas Recording), and 64 channel checkerboard or linear  
303 high density silicon probes (M1 and M2 probes, Cambridge Neurotech). We connected each electrode to  
304 a 32 or 64 channel head stage amplifier and digitizer (RHD2132 and RHD2164, Intan Technologies, USA),  
305 and then connected the head stage to a communication system (RHD2000 Evaluation Board, Intan  
306 Technologies, USA). Data were sampled at 30 kHz and band-pass filtered (2.5 - 7.6 kHz). We used  
307 OpenEphys (62) for electrophysiology data acquisition, and then used P-sort (63) to identify the simple  
308 and complex spikes in the heptodes and tetrodes recordings, and Kilosort and Phi (64) to identify the  
309 spikes for the silicon probes.

310 Our data set was composed of n=268 P-cells that were identified because of good isolation of CSs.  
311 Among these neurons, we also had good isolation of SSs in n=237 P-cells. We recorded from n=138 P-  
312 cells in the session in which the corrective saccade was required, and from n=130 P-cells in the session in  
313 which the corrective saccade was optional. The data for the session in which the corrective saccade was  
314 required were partially analyzed in a previous report (29).

### 315 *Behavioral protocol*

316 Each trial began with fixation of a center target for 200 ms, after which a primary target (0.5x0.5 deg  
317 square) appeared at one of 8 randomly selected directions at a distance of 5-6.5 deg (50 cells were  
318 recorded during sessions with 4 random directions). Onset of the primary target coincided with  
319 presentation of a distinct tone. As the animal made a saccade to this primary target, that target was  
320 erased, and a secondary target was presented at a distance of 2-2.5 deg, also at one of 8 randomly  
321 selected directions (4 directions for 50 cells). To assign a value to this erroneous outcome, in 51% of the  
322 sessions reward required both the primary and the corrective saccades, whereas in the remaining  
323 sessions reward required only the primary saccade. If reward did not require the corrective saccade, the

324 secondary target was presented only briefly, returning to the primary location following ~120 ms  
325 (adjusted during the recording session so that around 40% of the trials would produce a corrective  
326 saccade). Following 200 ms fixation of the final target, reward was presented with a distinct tone, and  
327 the center target was displayed.

### 328 *Data analysis*

329 All saccades, regardless of whether they were instructed by presentation of a visual target or not, were  
330 identified in the behavioral data using a velocity threshold. Saccades to primary, secondary, and central  
331 targets were labeled as targeted saccades, while all remaining saccades were labeled as task irrelevant.  
332 For the targeted saccades we computed the neurophysiological response to the presentation of the  
333 visual stimulus, as well as the response to the onset of the saccade. To compute the visual response to  
334 the secondary target, we aligned the data to the offset of the preceding primary saccade. For task  
335 irrelevant saccades, there were no visual targets and thus the response was aligned only to saccade  
336 onset.

337 Baseline firing rates of simple and complex spike were computed by dividing the total number of spikes  
338 by the duration of the entire recording. Instantaneous firing rates were calculated from peri-event time  
339 histograms with 1 ms bin size. We used a Savitzky–Golay filter (2nd order, 31 datapoints) to smooth the  
340 traces for visualization purposes.

341 CS directional tuning was computed by measuring the CS firing rates following target onset as a function  
342 of target angle with respect to the actual position of the eyes. We counted the number of CS after target  
343 onset up to saccade onset or a fixed 200 ms window, whichever happened first. Dividing the spike count  
344 by the duration of time resulted in the CS firing rate.

345 To compute SS population response during saccades, we began by computing the change in SS firing  
346 rate of each P-cell with respect to its baseline. Next, we labeled each saccade by measuring its direction  
347 of movement with respect to the CS-on of the P-cell. Finally, we summed the activities in all P-cells (i.e.,  
348 changes with respect to baseline) for saccades in direction CS-on, CS+45, etc., using a bin size of  $\pm 25$   
349 deg.

### 350 *Synchrony analysis*

351 With multi-channel electrodes, the activity of one neuron can easily be present on multiple channels,  
352 thus giving the illusion that the two channels are picking up two distinct neurons. To guard against this,  
353 we did two things. First, after we sorted the data in each channel, we waveform triggered the data  
354 recorded by channel A by the spikes recorded on channel B. This identified the waveform of the neuron  
355 recorded by channel B on the spike recorded on channel A. We compared this cross-channel triggered  
356 waveform with the within channel triggered waveform generated by the spikes recorded by channel A.  
357 The cross-channel triggered waveform must produce a different cluster of spikes in A than the main  
358 neuron isolated by A. If there were spikes that occurred within 1 ms of each other on channels A and B,  
359 we used these coincident-spike events to trigger the waveform in A. The spikes in A that were identified  
360 to be coincident with B should look approximately the same as the non-coincident spikes in A. Examples  
361 of this approach are provided in Sedaghat-Nejad et al. (28).

362 Second, we shuffled the trials for each pair of cells, thus eliminating the simultaneity of the  
363 recording. The shuffled data produced a measure of chance level synchrony. This step was crucial

364 because if the spike sorting was not robust, then the spikes in one channel should contaminate the  
365 spikes in the other, resulting in a shuffled synchronization index that had a numerical value greater than  
366 one. Thus, the shuffled synchrony produced a measure of quality of the recording, as shown in Fig. 1E.  
367 We shuffled the data 50 times and computed the chance level synchronization index.

368 To compute synchrony, we followed the procedures described in (29). Briefly, we computed  
369  $\Pr(S_2 = 1, S_1 = 1) / [\Pr(S_2 = 1) \Pr(S_1 = 1)]$ . This quantified whether the occurrence of a spike on  
370 channel 1 altered the probability of spikes on channel 2, corrected for probabilities expected from their  
371 average firing rates. Because channel labels 1 or 2 are interchangeable, we considered the average of  
372 the two cases as the corrected conditional probability for a pair of P-cells. Notably, the probabilities  
373 were always conditioned on visual or motor events, thus allowing the synchronization index to account  
374 for the change in the average firing rates of each cell which result from sensory or motor events. We  
375 used a 1 ms time window to compute SS synchrony, and a 20 ms time window to compute CS  
376 synchrony. Finally, we normalized the index by computing the ratio of the synchrony index as measured  
377 in the actual recording, to the synchrony index measured in the shuffled data. The shuffled data was  
378 generated by changing trial numbers for the two channels so that they were no longer simultaneous. For  
379 example, an index of 2 means that at that moment of time, it is twice as likely as chance that both  
380 neurons will fire a spike (chance level is at 1).

### 381 *Statistics*

382 To statistically analyze the population data, we computed p-values using two non-parametric methods:  
383 Wilcoxon rank sum, followed by bootstrap hypothesis testing (65). We report the Wilcoxon results in the  
384 manuscript, but ensured that in every case the bootstrap hypothesis testing confirmed that result. For  
385 example, to compare the CS rate response for the primary vs. secondary targets, we sampled with  
386 replacement to form a population of 50 P-cells, formed a population response, and then did this for 50  
387 populations. We used bootstrapping to form a null distribution with zero mean from the same  
388 distribution, and then computed the probability that the mean of the measured data was different than  
389 the null hypothesis.

390

391

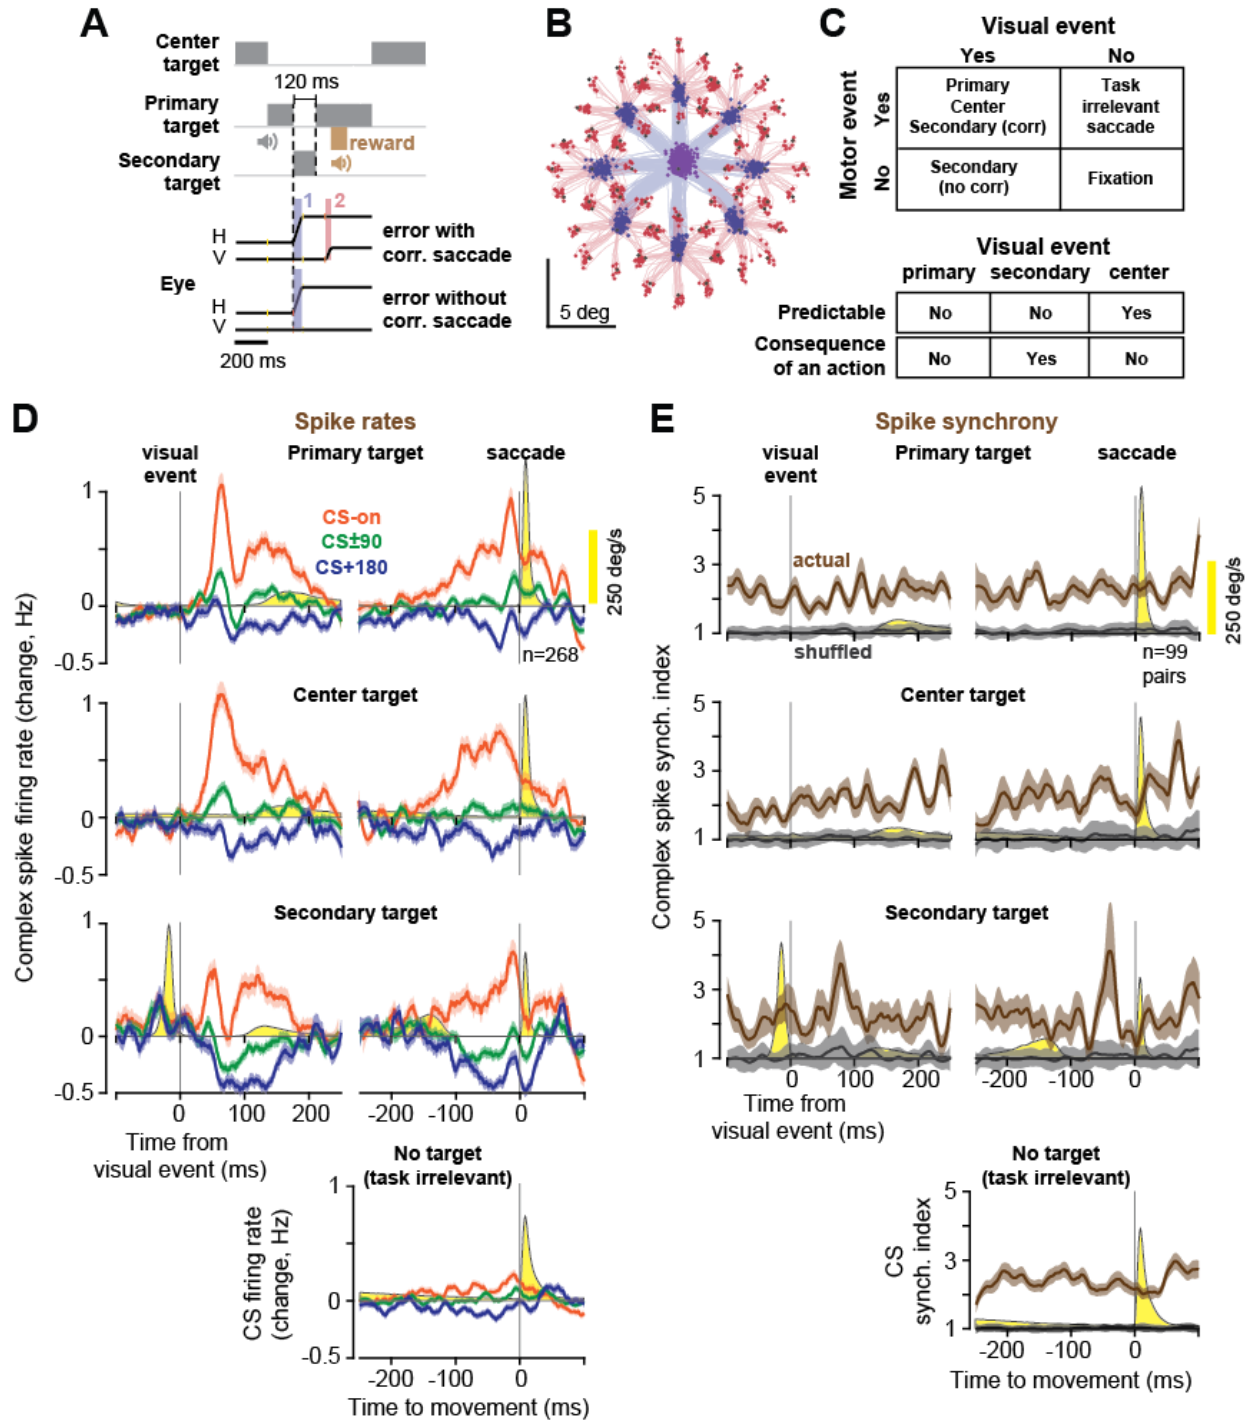

392  
393  
394  
395  
396  
397  
398  
399  
400  
401

**Figure 1.** CS rates were modulated by various sensorimotor events, but became synchronized only in response to the erroneous consequence of a movement. **A.** Task design. **B.** Eye position traces during the primary and corrective saccades. **C.** Some but not all visual events were followed by a movement, and some but not all movements were preceded by a visual event. While both the primary and secondary targets were unpredictable, only the secondary target was the erroneous sensory consequence of a movement. **D.** Average CS firing rates as a function of direction of visual and motor events. The rates were modulated following all visual events, and before all visually guided movements. **E.** The CSs became synchronized only in response to the secondary target. Data for the secondary target are from all trials in which the subject chose to make a corrective saccade. Eye velocity is shown in yellow. Error bars are SEM.

402

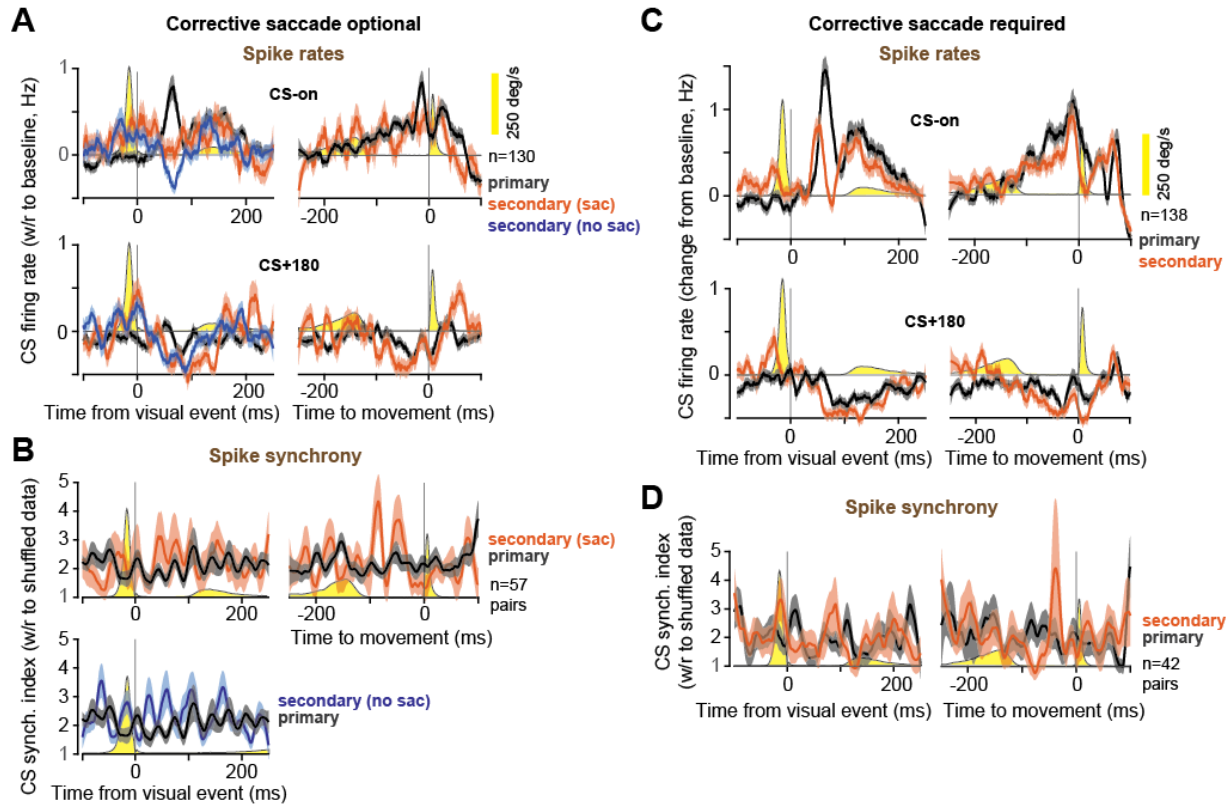

403

404

405 **Figure 2.** Devaluing the secondary target suppressed the CS rates, but the spikes became synchronized if the  
406 subject chose to make a corrective saccade. **A&B.** Data from sessions in which reward did not require making a  
407 corrective saccade. In direction CS-on, the firing rates in response to the secondary target were suppressed as  
408 compared to the primary target and suppressed further if the subject chose to ignore the stimulus. However, the  
409 CSs became synchronized if the subject chose to make a corrective saccade. Data are labeled based on whether  
410 the subject chose to ignore the secondary target (no sac) or make a corrective saccade (sac). **C&D.** Data from  
411 sessions in which the corrective saccade was required. Error bars are SEM.

412

413



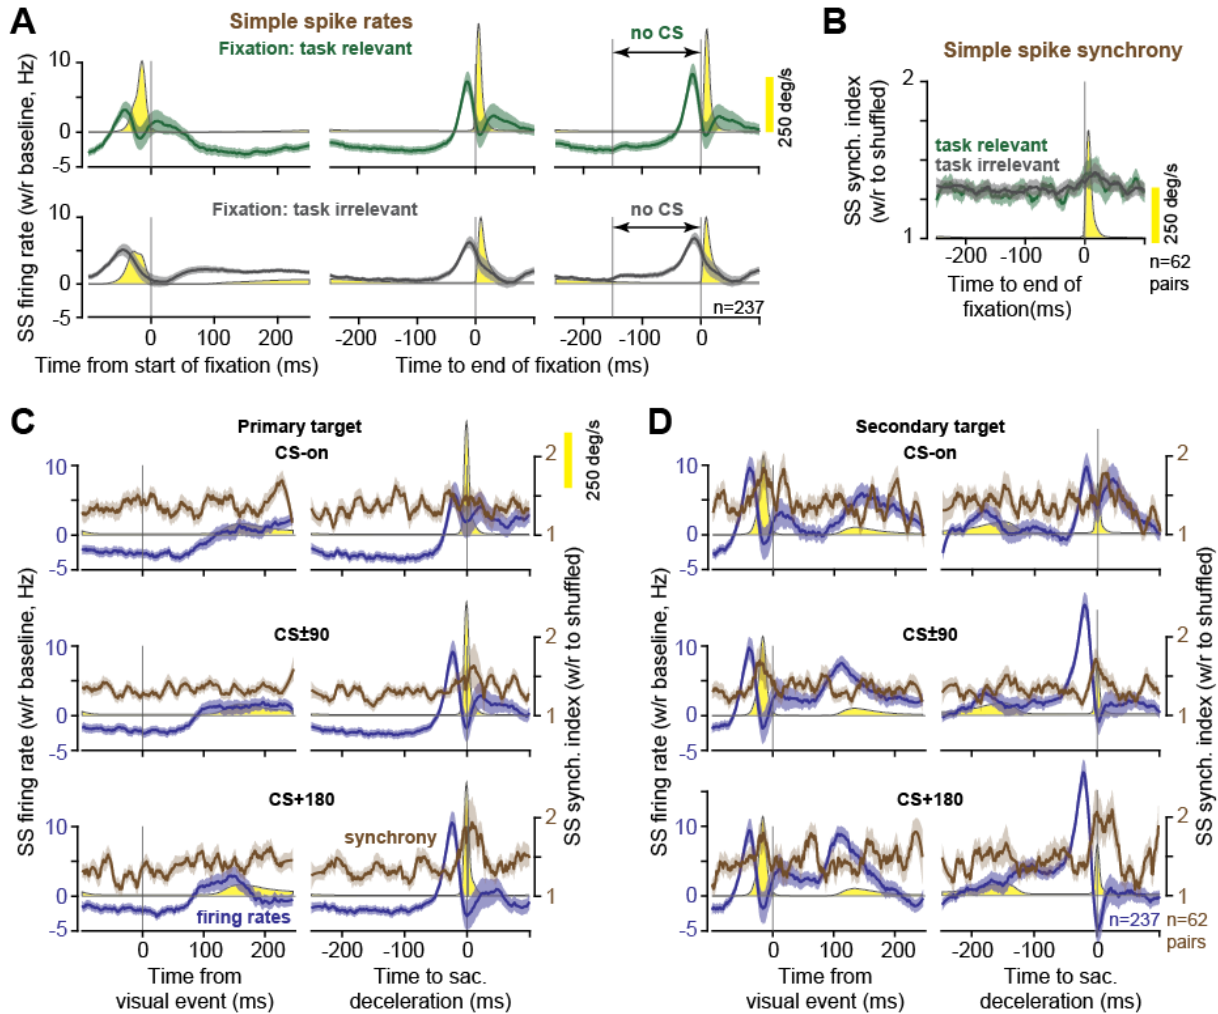

414  
 415 **Figure 3.** SSSs were suppressed during fixation but modulated during movements and synchronized near movement  
 416 end. **A.** SS rates were suppressed below baseline during task relevant fixations (i.e., when a visual target was  
 417 present), even in trials in which no CSs were present. However, SS rates were not suppressed during task irrelevant  
 418 fixation (no visual target). **B.** SS synchronization did not differ during task relevant and task irrelevant fixations. **C.**  
 419 SS rates and synchrony changed in response to the primary saccade, but not in response to the primary target. **D.**  
 420 SS rates and synchrony for the secondary target. Error bars are SEM.

421  
 422

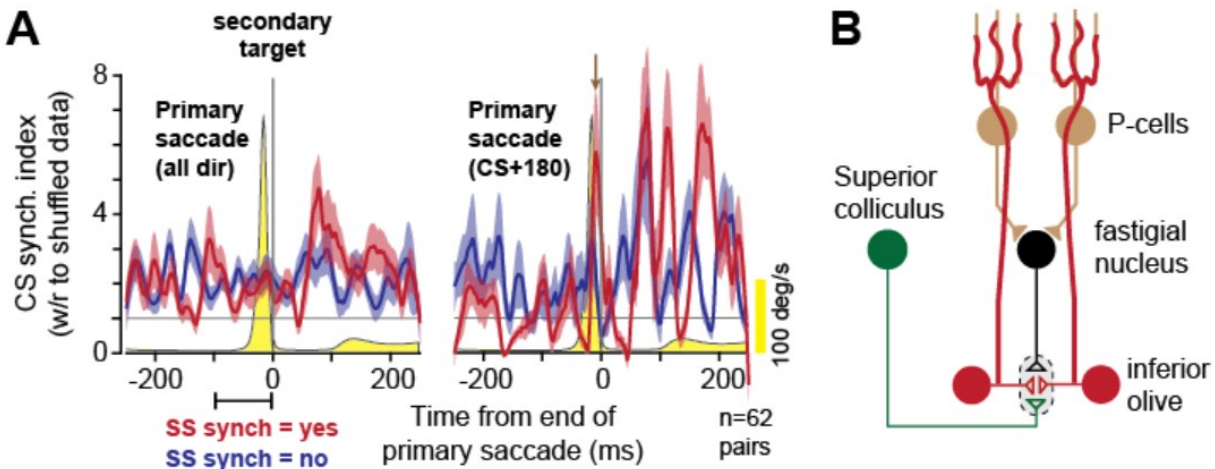

423  
424 **Figure 4.** SS synchrony during saccades increases the likelihood of CS synchrony in response to the erroneous  
425 sensory consequences of the movement. **A.** CS synchrony index in response to the secondary target, conditioned  
426 on whether during the primary saccade that preceded it there was a synchronous SS event (100ms period before  
427 primary saccade offset). Left panel is for all primary saccades, right panel is for primary saccades in direction  
428 CS+180. Arrow notes the CS synchronous event at the end of the primary saccade. **B.** In this working model, both  
429 visual and motor related activity in the superior colliculus are reported to the inferior olive, resulting in CSs. These  
430 CSs are not synchronized. During a saccade, the P-cell SSs are modulated and synchronized, entraining the nucleus  
431 neurons, which in turn affect the state of the inferior olive. If the saccade ends with a sensory event, that event  
432 produces activity in the superior colliculus, and is reported to the inferior olive, producing a CS. However, this CS  
433 will be more likely to be synchronous with a neighboring P-cell because of the preceding input from the cerebellar  
434 nucleus to the olive. Dashed area around synapses indicates gap junctions in which subthreshold membrane  
435 oscillations in one olivary cell affects the neighboring cell.  
436  
437



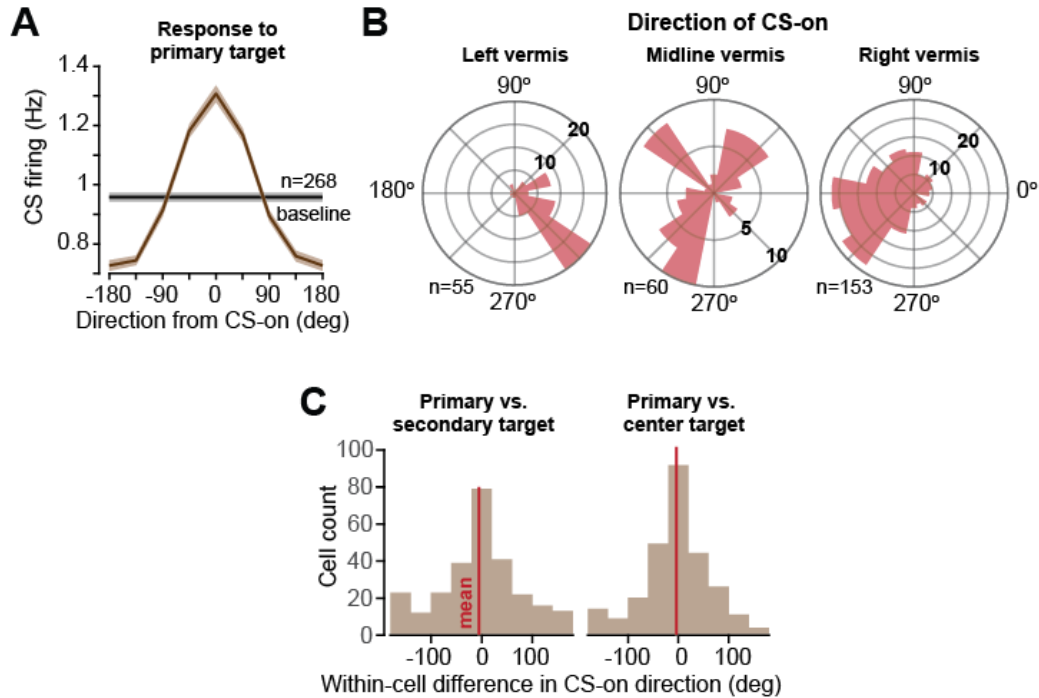

438  
439  
440  
441  
442  
443  
444  
445  
446  
447  
448

**Supplementary Fig. S1.** The direction of CS-on depended on the location of the P-cell in the vermis but remained consistent in response to various targets. **A.** Average CS firing rates following the presentation of the primary target, as a function of direction, aligned to direction CS-on. **B.** Distribution of CS-on as a function of location of recording in the vermis. Bin size is 15°, and the wedge at each bin represents the number of P-cells with that CS-on. **C.** Within cell difference between CS-on directions as computed following the onset of the primary target, the secondary target, and the central target. We found no systematic differences in the estimate of CS-on between various types of targets, and thus combined the response for all targets to compute the CS-on of each P-cell. Error bars are SEM.

449

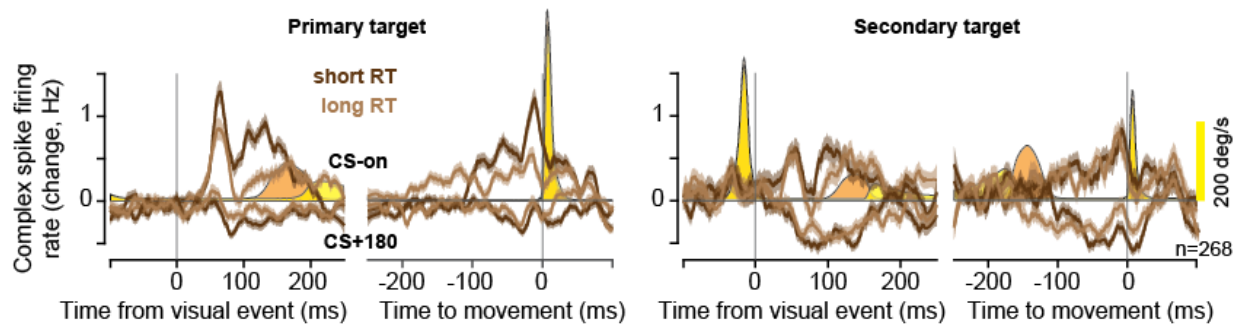

450

451

452

453

454

455

456

**Supplementary Fig. S2.** Data were separated based on the mean of the reaction time (RT) distribution for the primary (170 ms) and corrective saccades (150 ms). The CS rates were modulated following visual events, and before movements, but the strength of modulation for the primary target was weaker if the RT was longer. Darker colors indicate short RT. Error bars are SEM.

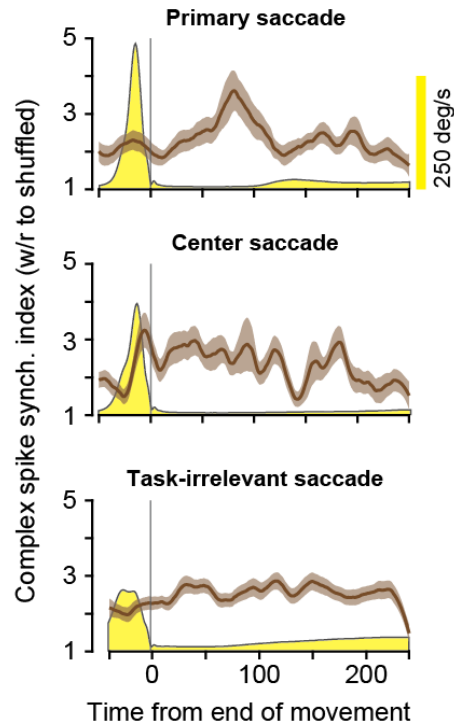

457  
458  
459  
460  
461  
462

**Supplementary Fig. S3.** Complex spikes increased their probability of synchronization following saccades that experienced an error (primary saccade followed by the secondary target), and not other saccades (center and task irrelevant saccades). Synchronization index is computed as the ratio with respect to the shuffled data. Error bars are SEM.

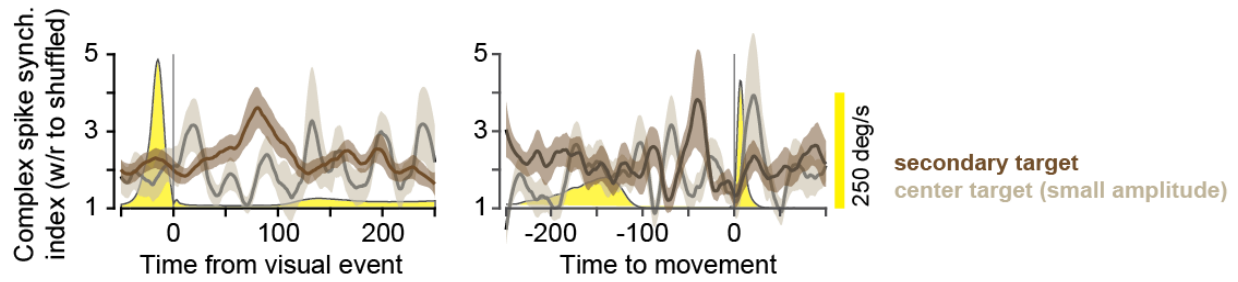

463

464

465 **Supplementary Fig. S4.** To check whether the CS synchrony for the secondary target was associated with its  
466 smaller amplitude, we sampled the center saccades that were amplitude matched with the secondary target. The  
467 probability of CS synchrony remained greater in response to the secondary target than the center target.

468

469

- 470 1. M. Ito, M. Sakurai, P. Tongroach, Climbing fibre induced depression of both mossy fibre  
471 responsiveness and glutamate sensitivity of cerebellar Purkinje cells. *J.Physiol.* **324**, 113–134  
472 (1982).
- 473 2. J. J. Kim, D. J. Krupa, R. F. Thompson, Inhibitory cerebello-olivary projections and blocking effect in  
474 classical conditioning. *Science.* **279**, 570–573 (1998).
- 475 3. J. F. Medina, S. G. Lisberger, Links from complex spikes to local plasticity and motor learning in the  
476 cerebellum of awake-behaving monkeys. *Nat.Neurosci.* **11**, 1185–1192 (2008).
- 477 4. Y. Yang, S. G. Lisberger, Role of Plasticity at Different Sites across the Time Course of Cerebellar  
478 Motor Learning. *J. Neurosci.* **34**, 7077–7090 (2014).
- 479 5. D. J. Herzfeld, Y. Kojima, R. Soetedjo, R. Shadmehr, Encoding of error and learning to correct that  
480 error by the Purkinje cells of the cerebellum. *Nat.Neurosci.* **21**, 736–743 (2018).
- 481 6. A. S. Fanning, A. M. Shakhawat, J. L. Raymond, Population calcium responses of Purkinje cells in  
482 the oculomotor cerebellum driven by nonvisual input. *J. Neurophysiol.* **126**, 1391–1402 (2021).
- 483 7. S. Kitazawa, T. Kimura, P. B. Yin, Cerebellar complex spikes encode both destinations and errors in  
484 arm movements. *Nature.* **392**, 494 (1998).
- 485 8. R. Soetedjo, A. F. Fuchs, Complex spike activity of purkinje cells in the oculomotor vermis during  
486 behavioral adaptation of monkey saccades. *J Neurosci.* **26**, 7741–7755 (2006).
- 487 9. S. Ohmae, J. F. Medina, Climbing fibers encode a temporal-difference prediction error during  
488 cerebellar learning in mice. *Nat.Neurosci.* **18**, 1798–1803 (2015).
- 489 10. C. Ju, L. W. J. Bosman, T. M. Hoogland, A. Velauthapillai, P. Murugesan, P. Warnaar, R. M. van  
490 Genderen, M. Negrello, C. I. D. Zeeuw, Neurons of the inferior olive respond to broad classes of  
491 sensory input while subject to homeostatic control. *J. Physiol.* **597**, 2483–2514 (2019).
- 492 11. N. Larry, M. Yarkoni, A. Lixenberg, M. Joshua, Cerebellar climbing fibers encode expected reward  
493 size. *eLife.* **8** (2019), doi:10.7554/eLife.46870.
- 494 12. L. Bina, V. Romano, T. M. Hoogland, L. W. J. Bosman, C. I. De Zeeuw, Purkinje cells translate  
495 subjective salience into readiness to act and choice performance. *Cell Rep.* **37**, 110116 (2021).
- 496 13. J. P. Welsh, E. J. Lang, I. Sugihara, R. Llinas, Dynamic organization of motor control within the  
497 olivocerebellar system. *Nature.* **374**, 453–457 (1995).
- 498 14. A. L. Hewitt, L. S. Popa, T. J. Ebner, Changes in Purkinje cell simple spike encoding of reach  
499 kinematics during adaption to a mechanical perturbation. *J.Neurosci.* **35**, 1106–1124 (2015).
- 500 15. T. M. Hoogland, J. R. De Gruijl, L. Witter, C. B. Canto, C. I. De Zeeuw, Role of Synchronous  
501 Activation of Cerebellar Purkinje Cell Ensembles in Multi-joint Movement Control. *Curr. Biol.* **25**,  
502 1157–1165 (2015).

- 503 16. W. Heffley, E. Y. Song, Z. Xu, B. N. Taylor, M. A. Hughes, A. McKinney, M. Joshua, C. Hull,  
504 Coordinated cerebellar climbing fiber activity signals learned sensorimotor predictions. *Nat.*  
505 *Neurosci.* **21**, 1431–1441 (2018).
- 506 17. M. J. Wagner, J. Savall, O. Hernandez, G. Mel, H. Inan, O. Rummyantsev, J. Lecoq, T. H. Kim, J. Z. Li, C.  
507 Ramakrishnan, K. Deisseroth, L. Luo, S. Ganguli, M. J. Schnitzer, A neural circuit state change  
508 underlying skilled movements. *Cell.* **184**, 3731-3747.e21 (2021).
- 509 18. R. Apps, M. Garwicz, Anatomical and physiological foundations of cerebellar information  
510 processing. *Nat.Rev.Neurosci.* **6**, 297–311 (2005).
- 511 19. F. Najafi, A. Giovannucci, S. S. Wang, J. F. Medina, Coding of stimulus strength via analog calcium  
512 signals in Purkinje cell dendrites of awake mice. *eLife.* **3**, e03663 (2014).
- 513 20. R. Soetedjo, Y. Kojima, A. F. Fuchs, Complex spike activity in the oculomotor vermis of the  
514 cerebellum: a vectorial error signal for saccade motor learning? *J.Neurophysiol.* **100**, 1949–1966  
515 (2008).
- 516 21. T. Ishikawa, S. Tomatsu, Y. Tsunoda, J. Lee, D. S. Hoffman, S. Kakei, Releasing dentate nucleus cells  
517 from Purkinje cell inhibition generates output from the cerebrocerebellum. *PLoS.One.* **9**, e108774  
518 (2014).
- 519 22. R. Llinás, R. A. Volkind, The olivo-cerebellar system: Functional properties as revealed by  
520 harmaline-induced tremor. *Exp. Brain Res.* **18**, 69–87 (1973).
- 521 23. V. Romano, P. Zhai, A. van der Horst, R. Mazza, T. Jacobs, S. Bauer, X. Wang, J. J. White, C. I. D.  
522 Zeeuw, Olivocerebellar control of movement symmetry. *Curr. Biol.* **32**, 654-670.e4 (2022).
- 523 24. J. L. Raymond, S. G. Lisberger, M. D. Mauk, The cerebellum: a neuronal learning machine? *Science.*  
524 **272**, 1126–1131 (1996).
- 525 25. R. Shadmehr, Population coding in the cerebellum: a machine learning perspective. *J Neurophysiol.*  
526 **124**, 2022–2051 (2020).
- 527 26. J. Wallman, A. F. Fuchs, Saccadic gain modification: visual error drives motor adaptation. *J*  
528 *Neurophysiol.* **80**, 2405–2416 (1998).
- 529 27. Y. W. Tseng, J. Diedrichsen, J. W. Krakauer, R. Shadmehr, A. J. Bastian, Sensory prediction errors  
530 drive cerebellum-dependent adaptation of reaching. *J.Neurophysiol.* **98**, 54–62 (2007).
- 531 28. E. Sedaghat-Nejad, D. J. Herzfeld, P. Hage, K. Karbasi, T. Palin, X. Wang, R. Shadmehr, Behavioral  
532 training of marmosets and electrophysiological recording from the cerebellum. *J.Neurophysiol.*  
533 **122**, 1502–1517 (2019).
- 534 29. E. Sedaghat-Nejad, J. S. Pi, P. Hage, M. A. Fakharian, R. Shadmehr, Synchronous spiking of  
535 cerebellar Purkinje cells during control of movements. *Proc. Natl. Acad. Sci.* **119**, e2118954119  
536 (2022).

- 537 30. I. Sugihara, S. P. Marshall, E. J. Lang, Relationship of complex spike synchrony bands and climbing  
538 fiber projection determined by reference to aldolase C compartments in crus IIa of the rat  
539 cerebellar cortex. *JComp Neurol.* **501**, 13–29 (2007).
- 540 31. D. Kostadinov, M. Beau, M. B. Pozo, M. Hausser, Predictive and reactive reward signals conveyed  
541 by climbing fiber inputs to cerebellar Purkinje cells. *Nat.Neurosci.* **22**, 950–962 (2019).
- 542 32. T. A. Blenkinsop, E. J. Lang, Block of Inferior Olive Gap Junctional Coupling Decreases Purkinje Cell  
543 Complex Spike Synchrony and Rhythmicity. *J. Neurosci.* **26**, 1739–1748 (2006).
- 544 33. J. R. De Gruijl, T. M. Hoogland, C. I. D. Zeeuw, Behavioral Correlates of Complex Spike Synchrony in  
545 Cerebellar Microzones. *J. Neurosci.* **34**, 8937–8947 (2014).
- 546 34. Y. El-Shamayleh, Y. Kojima, R. Soetedjo, G. D. Horwitz, Selective Optogenetic Control of Purkinje  
547 Cells in Monkey Cerebellum. *Neuron.* **95**, 51-62.e4 (2017).
- 548 35. E. N. Judd, S. M. Lewis, A. L. Person, Diverse inhibitory projections from the cerebellar interposed  
549 nucleus. *eLife.* **10**, e66231 (2021).
- 550 36. Y. Lefler, Y. Yarom, M. Y. Uusisaari, Cerebellar Inhibitory Input to the Inferior Olive Decreases  
551 Electrical Coupling and Blocks Subthreshold Oscillations. *Neuron.* **81**, 1389–1400 (2014).
- 552 37. A. L. Person, I. M. Raman, Purkinje neuron synchrony elicits time-locked spiking in the cerebellar  
553 nuclei. *Nature.* **481**, 502–505 (2012).
- 554 38. E. Leznik, V. Makarenko, R. Llinás, Electrotonically Mediated Oscillatory Patterns in Neuronal  
555 Ensembles: An In Vitro Voltage-Dependent Dye-Imaging Study in the Inferior Olive. *J. Neurosci.* **22**,  
556 2804–2815 (2002).
- 557 39. J. F. Medina, M. D. Mauk, Computer simulation of cerebellar information processing. *Nat.*  
558 *Neurosci.* **3**, 1205–1211 (2000).
- 559 40. J. X. Li, J. F. Medina, L. M. Frank, S. G. Lisberger, Acquisition of Neural Learning in Cerebellum and  
560 Cerebral Cortex for Smooth Pursuit Eye Movements. *J. Neurosci.* **31**, 12716–12726 (2011).
- 561 41. M. Junker, D. Endres, Z. P. Sun, P. W. Dicke, M. Giese, P. Thier, Learning from the past: A  
562 reverberation of past errors in the cerebellar climbing fiber signal. *PLOS Biol.* **16**, e2004344 (2018).
- 563 42. S. Khosrovani, R. S. V. D. Giessen, C. I. D. Zeeuw, M. T. G. De Jeu, In vivo mouse inferior olive  
564 neurons exhibit heterogeneous subthreshold oscillations and spiking patterns. *Proc. Natl. Acad.*  
565 *Sci.* **104**, 15911–15916 (2007).
- 566 43. L. Goffart, L. L. Chen, D. L. Sparks, Deficits in saccades and fixation during muscimol inactivation of  
567 the caudal fastigial nucleus in the rhesus monkey. *J.Neurophysiol.* **92**, 3351–3367 (2004).
- 568 44. S.-U. Lee, H.-J. Kim, J.-Y. Choi, J.-H. Choi, D. S. Zee, J.-S. Kim, Nystagmus only with fixation in the  
569 light: a rare central sign due to cerebellar malfunction. *J. Neurol.* (2022), doi:10.1007/s00415-022-  
570 11108-9.



- 571 45. G. Holmes, The cerebellum of man. *Brain*. **62**, 1–30 (1939).
- 572 46. J. X. Brooks, K. E. Cullen, The primate cerebellum selectively encodes unexpected self-motion.  
573 *Curr.Biol.* **23**, 947–955 (2013).
- 574 47. J. Laurens, H. Meng, D. E. Angelaki, Computation of linear acceleration through an internal model  
575 in the macaque cerebellum. *Nat. Neurosci.* **16**, 1701–1708 (2013).
- 576 48. D. J. Herzfeld, Y. Kojima, R. Soetedjo, R. Shadmehr, Encoding of action by the Purkinje cells of the  
577 cerebellum. *Nature*. **526**, 439–442 (2015).
- 578 49. M. L. Streng, L. S. Popa, T. J. Ebner, Modulation of sensory prediction error in Purkinje cells during  
579 visual feedback manipulations. *Nat. Commun.* **9**, 1099 (2018).
- 580 50. M. Kawato, S. Ohmae, H. Hoang, T. Sanger, 50 Years Since the Marr, Ito, and Albus Models of the  
581 Cerebellum. *Neuroscience*. **462**, 151–174 (2021).
- 582 51. C. F. Ekerot, H. Jorntell, M. Garwicz, Functional relation between corticonuclear input and  
583 movements evoked on microstimulation in cerebellar nucleus interpositus anterior in the cat.  
584 *ExpBrain Res.* **106**, 365–376 (1995).
- 585 52. C. I. De Zeeuw, Bidirectional learning in upbound and downbound microzones of the cerebellum.  
586 *Nat. Rev. Neurosci.* **22**, 92–110 (2021).
- 587 53. V. Gauck, D. Jaeger, The Control of Rate and Timing of Spikes in the Deep Cerebellar Nuclei by  
588 Inhibition. *J. Neurosci.* **20**, 3006–3016 (2000).
- 589 54. M. E. Broucke, Adaptive Internal Model Theory of the Oculomotor System and the Cerebellum.  
590 *IEEE Trans. Autom. Control.* **66**, 5444–5450 (2021).
- 591 55. E. J. Lang, T. Tang, C. Y. Suh, J. Xiao, Y. Kotsurovskyy, T. A. Blenkinsop, S. P. Marshall, I. Sugihara,  
592 Modulation of Purkinje cell complex spike waveform by synchrony levels in the olivocerebellar  
593 system. *Front. Syst. Neurosci.* **8** (2014) (available at  
594 <https://www.frontiersin.org/article/10.3389/fnsys.2014.00210>).
- 595 56. R. S. Van Der Giessen, S. K. Koekkoek, S. van Dorp, J. R. De Gruijl, A. Cupido, S. Khosrovani, B.  
596 Dortland, K. Wellershaus, J. Degen, J. Deuchars, E. C. Fuchs, H. Monyer, K. Willecke, M. T. G. De  
597 Jeu, C. I. De Zeeuw, Role of Olivary Electrical Coupling in Cerebellar Motor Learning. *Neuron*. **58**,  
598 599–612 (2008).
- 599 57. A. Mathy, S. S. Ho, J. T. Davie, I. C. Duguid, B. A. Clark, M. Hausser, Encoding of oscillations by  
600 axonal bursts in inferior olive neurons. *Neuron*. **62**, 388–399 (2009).
- 601 58. A. Rasmussen, D. A. Jirenhed, R. Zucca, F. Johansson, P. Svensson, G. Hesslow, Number of spikes in  
602 climbing fibers determines the direction of cerebellar learning. *J.Neurosci.* **33**, 13436–13440  
603 (2013).
- 604 59. Y. Yang, S. G. Lisberger, Purkinje-cell plasticity and cerebellar motor learning are graded by  
605 complex-spike duration. *Nature*. **510**, 529–532 (2014).

- 606 60. Y. Kojima, R. Soetedjo, Elimination of the error signal in the superior colliculus impairs saccade  
607 motor learning. *Proc.Natl.Acad.Sci.U.S.A.* **115**, E8987–E8995 (2018).
- 608 61. Y. Kojima, R. Soetedjo, Change in sensitivity to visual error in superior colliculus during saccade  
609 adaptation. *Sci.Rep.* **7**, 9566 (2017).
- 610 62. J. H. Siegle, A. C. Lopez, Y. A. Patel, K. Abramov, S. Ohayon, J. Voigts, Open Ephys: an open-source,  
611 plugin-based platform for multichannel electrophysiology. *JNeural Eng.* **14**, 045003 (2017).
- 612 63. E. Sedaghat-Nejad, M. A. Fakharian, J. Pi, P. Hage, Y. Kojima, R. Soetedjo, S. Ohmae, J. F. Medina, R.  
613 Shadmehr, P-sort: an open-source software for cerebellar neurophysiology. *J. Neurophysiol.* **126**,  
614 1055–1075 (2021).
- 615 64. M. Pachitariu, N. Steinmetz, S. Kadir, M. Carandini, H. K. D, Kilosort: realtime spike-sorting for  
616 extracellular electrophysiology with hundreds of channels. *bioRxiv*, 061481 (2016).
- 617 65. V. Ventura, in *Analysis of parallel spike trains* (Springer, Boston, MA, 2010).

618
